## **Math5 is required for retinal ganglion cell and optic nerve formation**

**Nadean L. Brown<sup>1,2,\*</sup>, Sima Patel<sup>2</sup>, Joseph Brzezinski<sup>1</sup> and Tom Glaser<sup>1,\*</sup>**

<sup>1</sup>Departments of Internal Medicine and Human Genetics, University of Michigan, Ann Arbor, MI 48109-0650, USA

<sup>2</sup>Department of Pediatrics at Children's Memorial Institute for Education and Research, Northwestern University Medical School, Chicago, IL 60614-3394, USA

\*Authors for correspondence (e-mail: n-brown2@northwestern.edu and tglaser@umich.edu)

Accepted 13 April 2001

### **SUMMARY**

The vertebrate retina contains seven major neuronal and glial cell types in an interconnected network that collects, processes and sends visual signals through the optic nerve to the brain. Retinal neuron differentiation is thought to require both intrinsic and extrinsic factors, yet few intrinsic gene products have been identified that direct this process. *Math5* (*Atoh7*) encodes a basic helix-loop-helix (bHLH) transcription factor that is specifically expressed by mouse retinal progenitors. *Math5* is highly homologous to *atonal*, which is critically required for R8 neuron formation during *Drosophila* eye development. Like R8 cells in the fly eye, retinal ganglion cells (RGCs) are the first neurons in the

vertebrate eye. Here we show that *Math5* mutant mice are fully viable, yet lack RGCs and optic nerves. Thus, two evolutionarily diverse eye types require *atonal* gene family function for the earliest stages of retinal neuron formation. At the same time, the abundance of cone photoreceptors is significantly increased in *Math5*<sup>-/-</sup> retinæ, suggesting a binary change in cell fate from RGCs to cones. A small number of nascent RGCs are detected during embryogenesis, but these fail to develop further, suggesting that committed RGCs may also require *Math5* function.

Key words: *Math5*, *Atoh7*, Mouse, Retina, Optic nerves

### **INTRODUCTION**

The vertebrate retina arises from an evagination of the anterior neural tube that forms a bilayered optic cup, comprising an inner neural retina and an outer pigmented epithelium. Mammalian retinal neurons and glia differentiate over an extended period, which in mice is from embryonic day 12 (E12) through postnatal day 21 (P21). In the initial stages, waves of dividing progenitor cells cease mitosis and migrate to the vitreal side of the optic cup, closest to the lens. This process of histogenesis continues through the ensuing 4 weeks and produces all retinal cell types. At later stages, as successive progenitors exit the cell cycle and become committed to particular cell fates, they migrate to fixed positions throughout the laminated retina, and establish synaptic connections to other neurons. [<sup>3</sup>H]thymidine-labeling experiments have demonstrated that retinal cell types are produced in sequence from multipotent progenitors (Sidman, 1961; Young, 1985). Each has a characteristic 'birthdate', defined by its terminal mitotic S phase, that strongly influences its identity. In the murine eye, the most likely birth order is retinal ganglion cells (RGCs), cone photoreceptors, amacrine and horizontal cells, followed by rod photoreceptors, bipolar cells and Müller glia, with significant overlap in the appearance of these different cell types (Cepko et al., 1996). Although phylogenetic differences in the birth order of retinal neurons have been observed, RGCs are the first neurons born in all vertebrate species examined (Altshuler et al., 1991).

RGCs are the only retinal neurons that extend axons outside the eye. As RGCs differentiate, their axons grow laterally toward the presumptive optic nerve head in response to molecular guidance cues (Birgbauer et al., 2000; Brittis and Silver, 1994; Deiner et al., 1997) and pass outward through the optic stalk (Hinds and Hinds, 1974; Silver and Sidman, 1980). These axons travel along the optic nerve to the chiasm, where they make characteristic pathway choices and project to six specific regions in the brain, including the lateral geniculate nucleus and superior colliculus (Rodieck, 1998). The optic nerve is largely composed of RGC axons, but also contains supporting glia and astrocytes, and the central retinal artery and vein. The physiology and histological characteristics of RGC subtypes are well known (Rodieck, 1998), yet no single intrinsic factor has been demonstrated that specifies RGC fate within the mammalian eye.

The cellular mechanisms of vertebrate and *Drosophila* retinogenesis are fundamentally different. In vertebrates, the continuous selection of committed neurons from a pool of multipotent progenitors leads to overlapping of neuronal birthdates, stochastic variation in clonal composition (Turner et al., 1990), and random spacing between cell bodies of different neuron types (Rockhill et al., 2000). In *Drosophila*, a strict spatial and temporal hierarchy of cell-cell inductive interactions creates a highly ordered and invariant array of ommatidia (Brennan and Moses, 2000; Rubin, 1989; Tomlinson, 1988). In addition, all fly photoreceptors synapse directly to neurons within the brain, while vertebrate photoreceptors connect to the brain via specialized

interneurons and RGCs, which are the sole projection neurons for the eye.

bHLH transcription factors are central to retinal neurogenesis (Cepko, 1999; Kageyama et al., 1995). In *Drosophila* photoreceptor development, the proneural gene *atonal* (*ato*) specifies the founding R8 neuron in each ommatidium (Dokucu et al., 1996; Jarman et al., 1994; Jarman et al., 1995). In addition to R8 determination, *atonal* also controls neuronal subtype identity (Chien et al., 1996; Sun et al., 2000) and neurite arborization (Hassan et al., 2000) within the *Drosophila* peripheral nervous system and brain, respectively. Among murine bHLH genes, *Math5* (also known as *Atoh7*) is the most closely related to *atonal* within the bHLH domain (Brown et al., 1998; Hassan and Bellen, 2000). This structural homology is consistent with the specific expression of *Math5* in the developing mouse retina (Brown et al., 1998), *Xath5* in the developing frog retina (Kanekar et al., 1997), *Cath5* in the chick eye (Liu et al., 2001; Matter-Sadzinski et al., 2001) and *Ath5* in zebrafish retinal progenitors (Masai et al., 2000). Ectopic expression of *Xath5* during frog eye development biases progenitors to become RGCs at the expense of later-born neurons such as bipolars and Müller glia (Kanekar et al., 1997). *Xath5* is therefore sufficient to specify RGC fate. However, ectopic expression of *Math5* in the same assay promotes formation of bipolar cells rather than RGCs (Brown et al., 1998). Thus, despite highly conserved structure and expression patterns, the functional orthology between *Math5*, *Xath5* and *atonal* is unclear.

In this report, we test the role of *Math5* in RGC formation by removing its function *in vivo*. We show that mice homozygous for a targeted *Math5* mutation have grossly normal eyes, but no optic nerves or chiasm. Histological and molecular analyses reveal an almost complete absence of RGCs in postnatal *Math5*<sup>-/-</sup> retinæ and an increase in cone photoreceptors. We further demonstrate that loss of *Math5* alters the early stages of RGC formation and conclude that *Math5* acts as a proneural gene for mammalian RGC determination.

## MATERIALS AND METHODS

### Targeted deletion of *Math5*

The genomic locus was targeted by homologous recombination using a 6.5 kb *EcoRI* fragment isolated from a mouse J1 ES cell phage library. A 256 bp *SmaI* fragment encoding the bHLH domain was excised and replaced with a *BamHI*-linked PGK-*neo*-bpA cassette. A cytoplasmic  $\beta$ -gal-pA cassette was then inserted in-frame after codon 18. The linearized construct was electroporated into R1 embryonic stem cells (Nagy et al., 1993) and colonies selected using G418. Homologous recombination was detected in 3% of the ES clones by long-range PCR, with one primer outside each arm and the other within the *neo* gene (Fig. 1A). These assays gave 2.3 kb (5' arm) and 4 kb (3' arm) PCR products only when recombination occurred correctly. Targeting was verified by the presence of a 17 kb *BamHI* fragment, instead of the normal 22 kb fragment, in genomic Southern blots hybridized with an external 5' probe (Fig. 1B). F<sub>1</sub> founders were generated by crossing chimeric males to C57BL/6J mice. Phenotypic analysis was performed on N<sub>2</sub>F<sub>2</sub> mice derived by crossing F<sub>1</sub> founders with strain 129S3/SvImJ and intercrossing the resulting progeny. For retinal cell counts and some  $\beta$ -gal staining experiments, albino adult mice and embryos were generated using an outbred CD-1 background.

Internal primers were used for routine genotyping of mouse litters and further verification of homologous recombination (Fig. 1C).

### mRNA analysis

To assess *Math5*,  $\beta$ -actin (*Actb*) and *Brn3b* (*Pou4f2*) mRNA expression, parallel RT-PCR assays were performed on total RNA collected from E15.5 eyes and pretreated with DNase I. Primer pairs were located in the 3' untranslated regions of *Math5* (accession no. AF071223) and *Brn3b* (accession no. S68377), and within the coding region of  $\beta$ -actin (accession no. M12481).

### Histology, immunohistochemistry and in situ hybridization

Mice were quickly sacrificed and their eyes, brains, or embryos dissected in cold phosphate-buffered saline (PBS). Tissues were fixed in Bouins or buffered formalin for paraffin embedding, or 4% paraformaldehyde for  $\beta$ -gal histochemistry, or freshly frozen in OCT (Miles Scientific) for cryosectioning. Paraffin sections (10  $\mu$ m) were either stained with Hematoxylin and Eosin, counterstained with Neutral Red following  $\beta$ -gal histochemistry, or processed for immunoperoxidase staining following antigen retrieval (Evers and Uylings, 1997). Cryosections (10  $\mu$ m) were fixed in 4% paraformaldehyde PBS and used for *Math5* digoxigenin in situ hybridization (Brown et al., 1998) or antibody labeling. Immunohistochemical and PNA lectin staining was performed according to published protocols (Rich et al., 1997; Sundin and Eichele, 1990) with the biotin-streptavidin system (ABC, Vector Labs), rabbit Pax6 antiserum (1:2000, Mastick and Andrews, 2001), rabbit S-cone opsin antiserum (1:20,000, Applebury et al., 2000), rabbit recoverin antiserum (1:500, Dizhoor et al., 1991), rabbit caspase-3 antisera (1:200, New England Biolabs), biotin-PNA (5  $\mu$ g/ml, Vector Labs), and the following monoclonal antibodies: anti-neuron-specific  $\beta$ -tubulin (TUJ1, 1:1000, Babco), anti-protein kinase C (MC5, 1:400, Sigma), anti-vimentin (LN9, 1:200, Sigma), anti-neurofilament (NN18 for 160 kDa and NE14 for 200 kDa, 1:500, Sigma), anti-tyrosine hydroxylase (TH2, 1:1000, Sigma), anti-syntaxin (HPC1, 1:1000, Sigma), anti-calretinin (mAb1568, 1:500, Chemicon), anti-calbindin (CB955, 1:500, Sigma), VC1.1 (1:200, Sigma), and anti-rhodopsin (RET-P1, 1:1000, Sigma). For  $\beta$ -gal visualization, tissues were fixed and stained as described previously (Sanes et al., 1986).

### Retinal disassociation and cell counts

Cone cell counts were performed on eyes from adult F<sub>2</sub> littermates obtained by intercrossing CD-1 *Math5*<sup>+/-</sup> mice. At least two mice from each genotype were compared. Neural retinæ were dissected free of other ocular tissues in HBSS-CMF (Ca<sup>2+</sup>/Mg<sup>2+</sup>-free Hanks buffered saline solution) and gently disassociated as described by Altshuler and Cepko with minor modifications (Altshuler and Cepko, 1992). Dissected retinæ were first incubated for 15 minutes at 37°C in normal HBSS with 300  $\mu$ g/ml hyaluronidase (Sigma, Type IV-S) and 1 mg/ml collagenase (Sigma, Type XI-S), gently washed, and then incubated for 10 minutes at 25°C in HBSS-CMF with 0.1% trypsin (Gibco). After trypsinization, 10% normal donkey serum (NDS) was added and the cells pelleted by low-speed centrifugation. The retinal cells from each mouse were then resuspended in 5 ml HBSS-CMF, 10% NDS, 10 mM Hepes pH 7.4, triturated gently to a single cell suspension, and plated on poly-D-lysine-coated glass slides for 90 minutes at 37°C in a humidified chamber. Slides were fixed in fresh ice-cold PBS with 4% PFA for 10 minutes, and processed for immunohistochemistry in TST (150 mM NaCl, 10 mM Tris pH 7.4, 0.1% Tween20) containing 2.5% NDS. S-cone opsin was detected using a 1:20,000 dilution of polyclonal rabbit antiserum (Applebury et al., 2000), a biotinylated secondary antibody (Jackson Immunoresearch), and streptavidin-DTAF (Molecular Probes). To visualize cell nuclei, RNaseA (200  $\mu$ g/ml) and propidium iodide (50  $\mu$ g/ml) were added to the secondary and tertiary reagents, respectively. Processed slides were viewed using a Nikon Eclipse

E800 fluorescence microscope and SPOT camera. Two-color images (200 $\times$ ) were captured digitally from random fields selected using a TRITC filter, and the total and S-cone opsin-positive cells in each image counted manually. For each mouse, 10-25 images (800-3000 cells) were analyzed. Differences between wild-type and mutant values were evaluated for statistical significance using the nonparametric Wilcoxon two-sample test for  $n > 10$  measurements (Sokal and Rohlf, 1969).

## RESULTS

### Targeted deletion of the *Math5* gene

To investigate the role of *Math5* during in vivo retinal development, we deleted its bHLH domain by gene targeting in mouse embryonic stem (ES) cells (Fig. 1). *Math5* contains a single exon, similar to most vertebrate *atonal* homologues. The bHLH domain was replaced with a PGK-*neo*-bpA cassette, thereby removing both DNA binding and dimerization functions and destroying the *Math5* transcription unit. We also inserted a cytoplasmic  $\beta$ -galactosidase ( $\beta$ -gal) cassette near the N terminus. ES cell colonies with the desired homologous recombination events were identified by Southern and long-range PCR analyses (data not shown). One ES cell line heterozygous for the targeted *Math5* mutation (4F1) gave rise to chimeric mice, which transmitted the mutant allele through the germline. Southern (Fig. 1B) and allele-specific PCR assays (Fig. 1C) were used to follow the mutant allele in descendants. *Math5* homozygotes (*Math5*<sup>-/-</sup>) and heterozygotes (*Math5*<sup>+/-</sup>) are indistinguishable from wild-type (*Math5*<sup>+/+</sup>) littermates in their viability, growth rate and fertility. Consequently, the distribution of F<sub>2</sub> genotypes was consistent with Mendelian inheritance: we observed 21 wild type (27%), 36 heterozygous (46%) and 21 homozygous (27%) mice at weaning. We confirmed the absence of *Math5* mRNA in homozygous mutant embryos by reverse transcriptase (RT) PCR using RNA derived from E15.5 eyes (Fig. 1D).

### *Math5*- $\beta$ -gal expression during retinogenesis

The targeted allele contains a histochemical reporter, *Escherichia coli*  $\beta$ -galactosidase, which is transcribed from the endogenous *Math5* promoter (Fig. 1A). The  $\beta$ -gal reporter is an exquisitely sensitive tool for detecting gene expression (Lawson et al., 1999). Although *Math5* encodes a nuclear protein, we used a cytoplasmic  $\beta$ -gal cassette to demarcate *Math5* expression domains in the embryo and reveal the processes of differentiated neurons. In heterozygous E11.5 embryos, the pattern of  $\beta$ -gal expression in retinal progenitors was identical to *Math5* mRNA (Fig. 2A,B) and coincides with the onset of histogenesis. After the initiation of RGC differentiation, we noted two layers of  $\beta$ -gal-expressing cells within the retinal neuroepithelium (Fig. 2C,D). One layer is located at the ventricular (sclerad) surface, closest to the pigmented epithelium (RPE), and corresponds to the zone where retinal progenitors undergo mitosis (Sidman, 1961). These retinal progenitors also express *Math5* mRNA (compare Fig. 2D and E). The distribution of *Math5* mRNA (Brown et al., 1998) and  $\beta$ -gal activity within this layer is not uniform, but instead suggests a radial columnar pattern. The second layer is located at the vitreal surface, closest to the lens, where terminally differentiating RGCs accumulate. These cells express  $\beta$ -gal within their somata and axons (Fig. 2D). We also noted  $\beta$ -gal

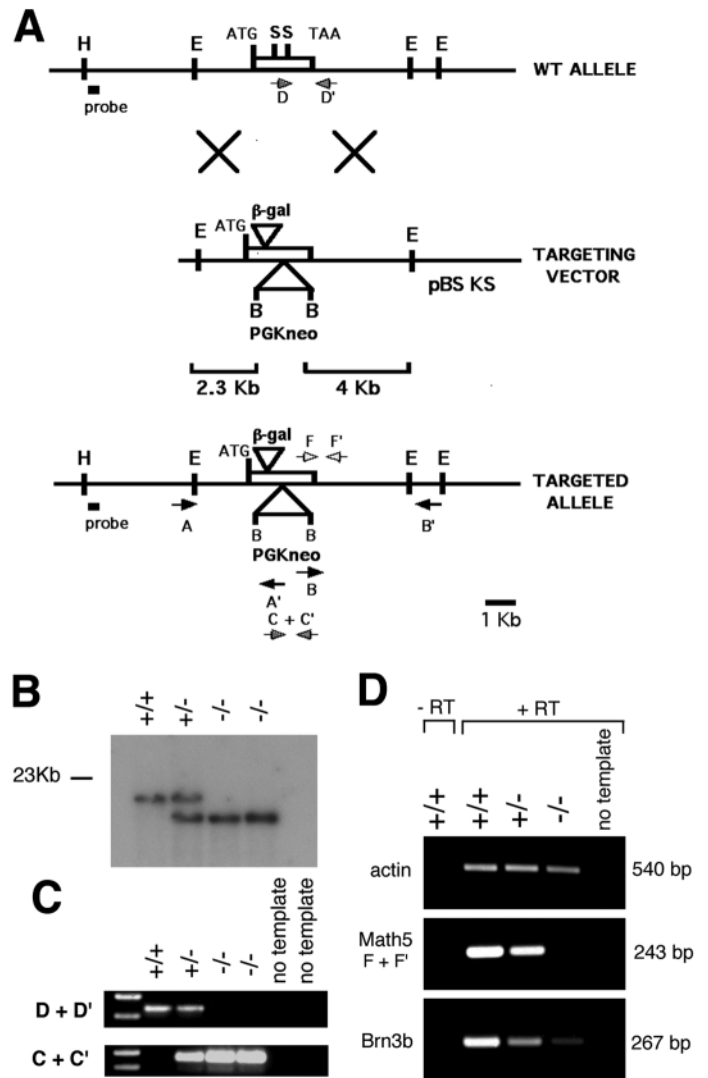

**Fig. 1.** Targeted disruption of *Math5*. (A) Homologous recombination between 2.3 kb and 4 kb vector arms resulted in replacement of the bHLH domain (contained within the *Sma*I fragment) with a PGK-*neo* cassette and insertion of cytoplasmic  $\beta$ -gal near the N terminus of *Math5*. Positions of the single-copy probe and PCR primers are indicated. Primers A+A' (5' arm) and B+B' (3' arm) were used for long-range PCR. (B) *Bam*HI Southern analysis of littermate tail DNA obtained from an F<sub>2</sub> cross. (C) Internal PCR primers (D+D' for wild-type, C+C' for mutant) amplify allele-specific products from weaning tail DNA. (D) RT-PCR products (F+F') from E15.5 total eye RNA show the absence of *Math5* mRNA and a great reduction of *Brn3b* mRNA in the *Math5*<sup>-/-</sup> mutant, in comparison to  $\beta$ -actin. B, *Bam*HI; E, *Eco*RI; H, *Hind*III; S, *Sma*I.

expression within the optic nerve at E17.5 (Fig. 2F) and in cone photoreceptors at P21 (Fig. 2G). Consistent with the latter observation, we have noted a low level of *Math5* mRNA expression in the photoreceptor cell layer at P0.5 (data not shown).  $\beta$ -gal expression in these differentiated cell types may reflect perdurance of this stable enzyme (Hall et al., 1983) or persistent, low level transcription of *Math5* in some differentiated neurons, combined with the high sensitivity of this reporter system. No other retinal neuron expression domain was observed.

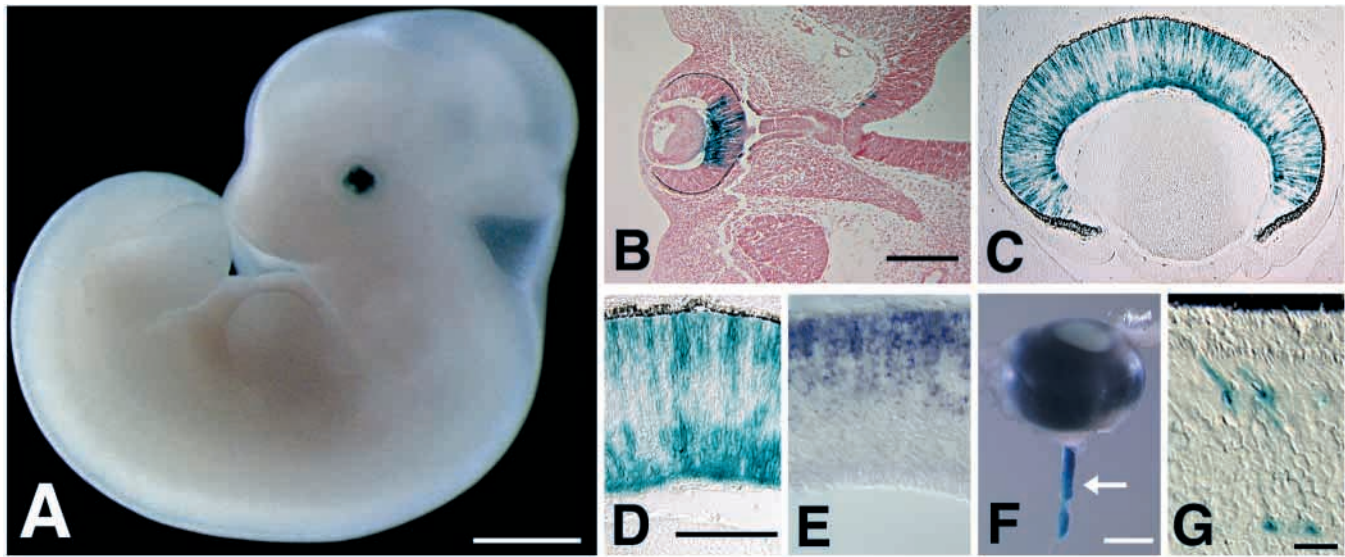

**Fig. 2.** Embryonic  $\beta$ -gal expression in  $Math5^{+/-}$  eyes. (A,B) E11.5  $\beta$ -gal expression in the developing optic cup. B shows a horizontal section through the whole-mount embryo in A. The overall pattern is identical to endogenous  $Math5$  mRNA (see Fig. 2 of Brown et al., 1998).  $\beta$ -gal staining begins in the dorsal central cup. A small number of positive cells are also visible in the diencephalon near the base of the optic stalk. (C,D) E15.5 retinal  $\beta$ -gal expression.  $\beta$ -gal is present in progenitors and differentiating RGCs. D shows a higher magnification. E. In situ hybridization at E15.5 showing  $Math5$  mRNA expression solely in retinal progenitors. (F)  $\beta$ -gal expression in the optic nerve at day E17.5 (arrow). (G)  $\beta$ -gal-positive cells with characteristic cone morphology in the photoreceptor layer of a heterozygote at P21. Bars are 1 mm in A; 200  $\mu$ m in B; 100  $\mu$ m in D; 500  $\mu$ m in F; and 20  $\mu$ m in G.

### Ocular phenotypes of adult $Math5^{-/-}$ mice

$Math5^{-/-}$  mice appear normal externally, and have average sized eyes with intact extraocular muscles and periocular tissues. However, they lack optic nerves and chiasmata (Fig. 3A,B). These structures are grossly normal in heterozygotes, and are indistinguishable from those of  $Math5^{+/+}$  littermates. Failure to form optic nerves strongly suggests that RGCs are missing or abnormal in  $Math5^{-/-}$  mice.

Histological analysis demonstrated overall structural similarity between postnatal  $Math5^{-/-}$  and  $Math5^{+/+}$  eyes. However, mutant retinæ have major abnormalities. First, they are 20–25% thinner than wild type, primarily due to decreased width of the inner plexiform (IPL) and nuclear (INL) layers (Fig. 3C,D). Second, we observed significantly fewer cells in the ganglion cell layer (GCL). In normal mice, only 41% of the cells in this layer are actually RGCs and contribute axons to the optic nerve; the remaining 59% are considered displaced amacrine cells (Dräger and Olsen, 1981; Jeon et al., 1998; Perry, 1981). Third, the majority of mutant eyes have areas with disrupted cell layering (Fig. 3E), including rosettes (arrowheads in Fig. 3F). Fourth, we found no optic stalk remnant in serial sections of adult  $Math5^{-/-}$  eyes, and the central artery and vein, which normally enter the eye via the optic nerve, were absent. Fifth, we observed ectopic blood vessels within the posterior chamber in many mutant animals (arrows in Fig. 3F) and less frequently within the GCL or IPL (not shown). These may reflect choroidal neovascularization or persistent hyaloid vessels.

### Specific neuron classes are altered in $Math5^{-/-}$ retinæ

To assess the abundance and patterning of the seven major cell types, we examined sections of postnatal  $Math5^{+/+}$ ,  $Math5^{+/-}$  and  $Math5^{-/-}$  eyes by light microscopy using a panel of 15

terminal differentiation markers. No significant difference was noted between  $Math5^{+/+}$  and  $Math5^{+/-}$  eyes in the expression level or number of positive cells for any marker. Because laminar disruptions in  $Math5^{-/-}$  eyes could differentially affect cell populations, we selected regions with relatively normal structure for comparison. Using both 160 kDa and 200 kDa neurofilament markers (Nixon et al., 1989), we discovered a total absence of RGCs and axon bundles in homozygous  $Math5$  mutant retinæ (Fig. 4A,B and data not shown). Immunostaining with the neuron-specific  $\beta$ -tubulin marker TUJ1 (Brittis and Silver, 1994; Macabe et al., 1999; Snow and Robson, 1994; Watanabe et al., 1991) further highlighted a complete absence of RGCs and axon bundles in P21  $Math5^{-/-}$  eyes (Fig. 4C,D).

Interestingly, we also discovered that the abundance of cone photoreceptors was substantially increased in  $Math5^{-/-}$  retinæ. We confirmed this increase using three different cone cell markers – peanut agglutinin (PNA), a lectin that binds to the matrix sheath surrounding cone but not rod photoreceptors (Blanks and Johnson, 1983; Ng et al., 2001; Rich et al., 1997; Fig. 4E,F); short wavelength (S) cone opsin, which is expressed in a ventral-to-dorsal gradient by approximately 70–80% of cones in normal mice (Applebury et al., 2000; Fig. 4G,H); and neuron-specific  $\beta$ -tubulin (TUJ1), which is present in cones at significant but lower levels than in RGCs (Fig. 4C,D). In mutant mice, these cones were often clustered or abnormally positioned in the outer segment layer (Fig. 4F,H). Similar cone cell findings were noted at P7 and P14 (data not shown). To determine the magnitude of the cone cell increase, we disassociated adult neural retinæ and counted the proportion of cells that are S-cone opsin-positive (Fig. 4I,J). In normal laboratory mice, cones account for 2.8% of all photoreceptors (Carter-Dawson and LaVail, 1979a; Jeon et al.,

**Fig. 3.** Ocular abnormalities in adult *Math5*<sup>-/-</sup> mice. (A,B) Ventral view of *Math5*<sup>+/+</sup> and *Math5*<sup>-/-</sup> P21 brains, with rostral ends pointing upwards. Olfactory bulbs have been removed. Both optic nerves and the optic chiasm are absent in the *Math5*<sup>-/-</sup> mouse. (C-F) Hematoxylin and Eosin-stained transverse sections of P21 *Math5*<sup>+/+</sup> (C) and *Math5*<sup>-/-</sup> (D-F) eyes. Mutant retinæ have regions of normal (D,F) and disrupted laminar structure (E and arrowheads in F). However, even in areas with largely normal structure, cells and axons are missing from the INL, IPL and GCL (D,E). Ectopic blood vessels are present in the vitreal space of mutant eyes (arrows in F). gcl, ganglion cell layer; inl, inner nuclear layer; onl, outer nuclear layer. Bars are 1.5 mm in A; 20 µm in C; and 200 µm in F.

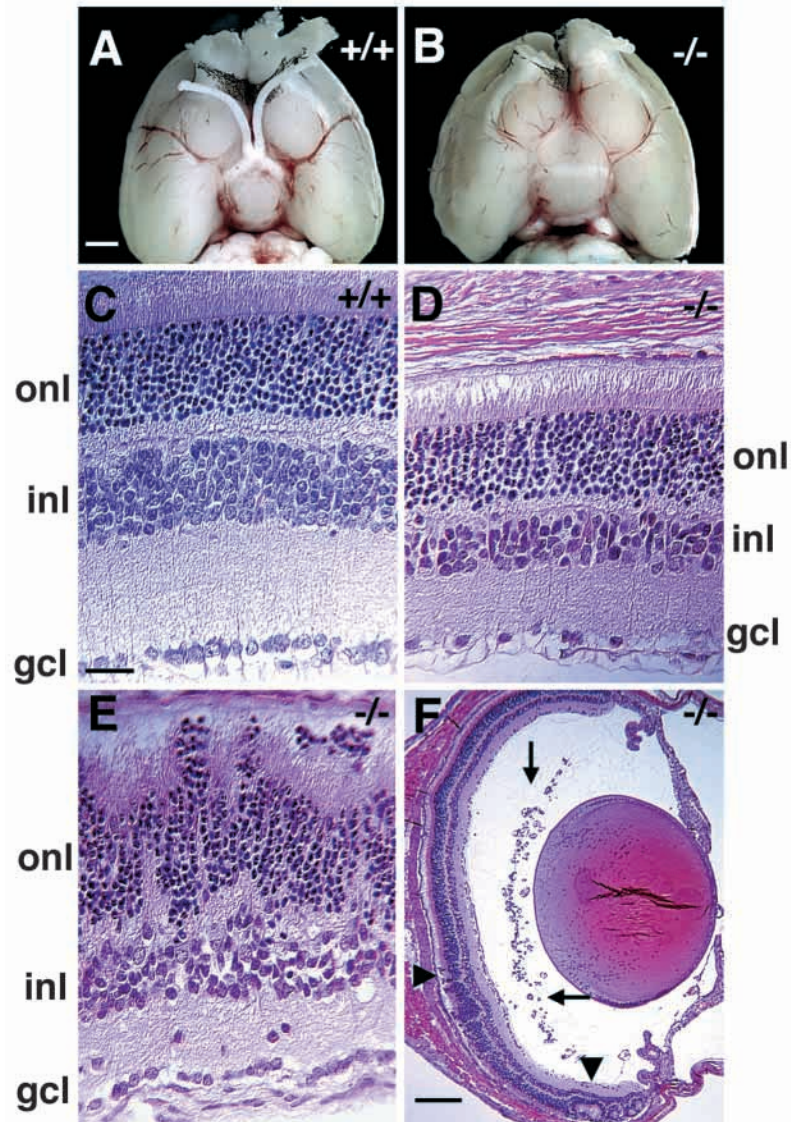

1998), and thus approximately 2.5% of all retinal cells (Rodieck, 1998). We observed that  $1.7 \pm 0.2\%$  of disassociated retinal cells from *Math5*<sup>+/-</sup> mice were reactive with S-cone opsin antisera. These two values are similar, if one assumes that 70% of cones express S-opsin (Applebury et al., 2000). In *Math5*<sup>-/-</sup> littermates, the proportion of positive retinal cells was  $3.0 \pm 0.4\%$ , which is significantly higher (Fig. 4I). The ratio of cones to RGCs in normal C57BL/6 mice is approximately four to one (roughly 180,000 to 45,000; Jeon et al., 1998). Since cones are increased by 75% in *Math5*<sup>-/-</sup> mice, this exceeds the loss of RGCs by two- to three-fold. Although this calculation ignores variations in the number of RGCs among normal inbred laboratory mouse strains (Jeon et al., 1998; Williams et al., 1998) and assumes that there is no significant decrease in the number of rod photoreceptors in the *Math5* mutant (see below), the reciprocal changes in RGC and cone cell populations are comparable in magnitude.

Amacrine cells have highly overlapping birthdates with RGCs and cones. This class of cells, originally named because they have no axons (Ramón y Cajal, 1892), is extremely heterogeneous and consists of at least 22 different morphologically and molecularly distinct subtypes (MacNeil and Masland, 1998; Masland, 1988; Strettoi and Masland, 1996). Although the majority of amacrine cells reside in the INL, a significant proportion are located in the GCL, where they are termed displaced amacrine cells. We were therefore particularly interested in studying these cells in *Math5*<sup>-/-</sup> retinæ. The protein syntaxin is present in the dendritic processes and perikarya of all amacrine cells (Barnstable et al., 1985). We observed similar patterns of immunostaining with this pan-amacrine marker in mutant and wild-type eyes (Fig. 5A,B), indicating that amacrine cells as a whole are grossly normal. The transcription factor Pax6 was also similarly expressed by INL and displaced amacrine cells in mutant and wild-type postnatal eyes (Fig. 5C,D). Although Pax6 protein is normally expressed by both amacrine cells and RGCs in postnatal retinæ (Belecky-Adams et al., 1997; Davis and Reed, 1996; Hitchcock et al., 1996; Koroma et al., 1997), ganglion cells are absent in the *Math5* mutants (Fig. 4B,D). On the basis of their relative density and expression profile (neurofilament- and TUJ1-negative, syntaxin- and Pax6-positive), we conclude that most, if not all,

of cells remaining in the GCL of adult *Math5*<sup>-/-</sup> mice (Fig. 3D) are displaced amacrine cells.

To further characterize this diverse cell population, we examined two important amacrine subtypes. A2 cells are the single most common subtype of amacrine cells, accounting for 12.6% of all amacrine cells in the rabbit (MacNeil and Masland, 1998), and are selectively labeled with antibodies to the calcium-binding protein calretinin (Massey and Mills, 1999). We found that A2 amacrine cells are decreased in *Math5* mutants (Fig. 5E,F) but that a substantial fraction of cells remaining in the GCL are calretinin-positive. These observations are consistent with our conclusion that the cells remaining in the GCL are displaced amacrine cells. Dopaminergic amacrine cells are relatively rare, arborize extensively, and appear to have a neuromodulatory role (Masland, 1988). This amacrine subtype, identified by tyrosine hydroxylase immunostaining (Ballesta et al., 1984), appears to be missing in *Math5*<sup>-/-</sup> mice (data not shown). However, because the overall number of amacrine cells is largely unaffected in *Math5*<sup>-/-</sup> eyes, it is plausible that one or more untested subclass will exhibit an increase in cell number.

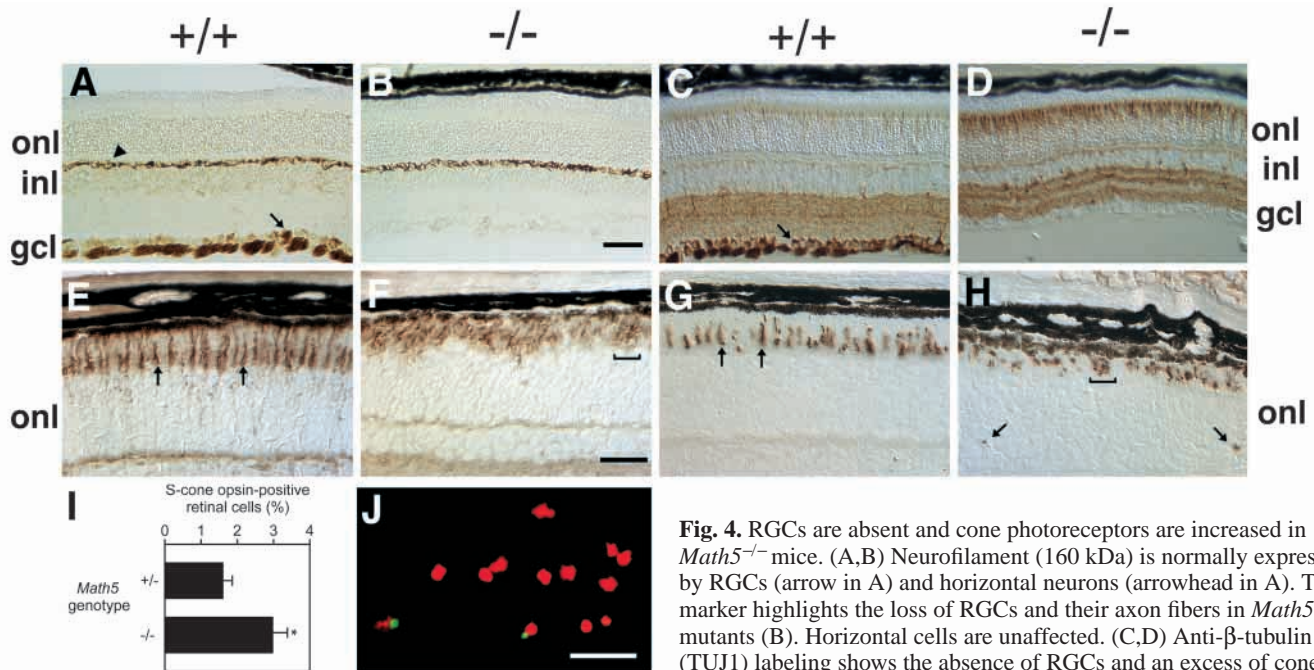

**Fig. 4.** RGCs are absent and cone photoreceptors are increased in *Math5*<sup>-/-</sup> mice. (A,B) Neurofilament (160 kDa) is normally expressed by RGCs (arrow in A) and horizontal neurons (arrowhead in A). This marker highlights the loss of RGCs and their axon fibers in *Math5* mutants (B). Horizontal cells are unaffected. (C,D) Anti-β-tubulin (TUJ1) labeling shows the absence of RGCs and an excess of cone photoreceptors in *Math5*<sup>-/-</sup> retinæ. RGCs are strongly labeled in the wild-type section (arrow). (E,F) Peanut agglutinin (PNA) stains all cone photoreceptors. Individual cones are visible in the wild-type (arrows in E) but the density of cones is greatly increased in the *Math5*<sup>-/-</sup> mice (F). (G,H) The abundance of S-cones is also increased in *Math5* mutants. The arrows in G indicate normal S-cone outer segments. Mutant cones are irregularly arranged in the outer retina (brackets in F and H). In some mutant sections, S-cone outer segments were observed within the ONL (arrows in H), OPL or INL. (I) Histogram comparing the abundance of S-cones in *Math5*<sup>+/+</sup> and *Math5*<sup>-/-</sup> mice as a percentage of total retinal cells. The bars show mean values and standard errors for these two genotypes. The increase in cones in *Math5*<sup>-/-</sup> mice is statistically significant ( $t_{s[\infty]} = 2.74$ ,  $P < 0.01$ ). (J) Dissociated retinal cells labeled with S-cone opsin antisera (green) and propidium iodide (red). All retinal sections (A-H) are from P21 mice. gcl, ganglion cell layer; inl, inner nuclear layer; onl, outer nuclear layer. Bars are 100 μm in B; 30 μm in F; 50 μm in J.

Loss of *Math5* had no apparent effect on the number or arrangement of rods, assessed by rhodopsin immunostaining (data not shown), or horizontal cells, assessed by calbindin (data not shown) and 160 kDa neurofilament immunostaining (Fig. 4AB). However, we did observe a decrease in rod bipolar (Fig. 5G,H) and Müller glial (Fig. 5I,J) cells. The rod bipolars also did not form a defined sublayer in the IPL. A similar decrease in cone bipolars was noted using the marker recoverin (data not shown). This reduction in bipolars and Müller glia may result directly from loss of *Math5* activity or indirectly from a depletion of progenitors earlier in development.

#### RGC development is abnormal in *Math5*<sup>-/-</sup> mice

Our initial assessment of the *Math5*<sup>-/-</sup> retinal phenotype focused on adult eyes so that all neuron and glial cell classes could be examined simultaneously. However, at birth, mutant retinæ appeared thinner and less well laminated (data not shown). This suggested that *Math5* is required at earlier, prenatal stages of retinal development. We therefore examined mutant retinæ at E15.5, when *Math5* mRNA is maximally expressed and at E13.5, which is 1-2 days after the onset of RGC differentiation. At both ages, *Math5*<sup>-/-</sup> retinæ are noticeably thinner than those of *Math5*<sup>+/+</sup> or *Math5*<sup>+/-</sup> littermates (compare Fig. 6A with B, 6E with F, and 6G with H). Hematoxylin and eosin staining at E15.5 showed that RGC axon bundles, normally present at the vitreal surface, are missing or greatly diminished in *Math5*<sup>-/-</sup> retinæ (arrows in Fig. 6A,B). The reduction in RGC axons was also

revealed by comparing the patterns of β-gal expression in *Math5*<sup>+/+</sup> and *Math5*<sup>-/-</sup> eyes at E15.5 (arrows in Fig. 6C,D). Intense β-gal staining of RGC axons was observed at the vitreal margin in *Math5*<sup>+/+</sup> but not in *Math5*<sup>-/-</sup> eyes. In addition, β-gal-positive cells, which are confined to two layers in *Math5*<sup>+/+</sup> optic cups at E15.5, were distributed across the thickness of the retina (compare Fig. 6C with D). To determine if any differentiating RGCs are present transiently, we examined the E15.5 mutant retinæ with the marker TUJ1, which specifically identifies RGCs at this age (Brittis and Silver, 1994; Watanabe et al., 1991). In contrast to the adult eye (Fig. 4C,D), we found that loss of *Math5* caused a great reduction, but not a complete absence, of RGCs at E15.5 (Fig. 6E,F).

We also compared *Math5*<sup>-/-</sup>, *Math5*<sup>+/+</sup> and *Math5*<sup>+/-</sup> eyes at E15.5 for expression of *Brn3b* by semi-quantitative RT-PCR (Fig. 1D). This POU domain transcription factor is expressed by nascent RGCs as they leave the cell cycle, migrate to the vitreal surface of the retina, and differentiate (Erkman et al., 1996; Xiang et al., 1993). Targeted deletion of *Brn3b* causes a 70% reduction in the number of RGCs in the adult eye (Erkman et al., 1996; Gan et al., 1996). This gene may thus be a downstream target of *Math5* regulation. Our results show a severe reduction of *Brn3b* expression in *Math5*<sup>-/-</sup> eyes at E15.5 and an intermediate level in heterozygotes (Fig. 1D).

Finally, we assessed RGC formation in *Math5*<sup>-/-</sup> retinæ at E13.5 using the 160 kDa neurofilament marker (Fig. 6G,H).

**Fig. 5.** Other retinal neuron defects in *Math5*<sup>-/-</sup> mice. (A,B) Anti-syntaxin (HPC-1) immunostaining shows that amacrine cells in vitread INL (arrow) and displaced amacrine cells in the GCL are grossly unaffected. (C,D) Pax6 is similarly expressed by INL and displaced amacrine cells of wild-type (C) and *Math5* mutant mice (D). (E,F) Calretinin-positive A2 amacrine cells in the INL (arrow) and GCL (arrowhead) are reduced in the *Math5* mutant (F) compared to wild-type (E). (G,H) Rod bipolar cells labeled with anti-protein kinase C have cell bodies in the sclerad INL (arrow) and synapse with photoreceptors in the OPL and A2 amacrine cells in the IPL. These neurons are reduced in *Math5*<sup>-/-</sup> retinæ and lack well organized synaptic termini in the IPL. (I,J) Anti-vimentin staining shows radial fibers of Müller glia extending across *Math5*<sup>+/+</sup> retinal laminae. The abundance of Müller glia is reduced in *Math5*<sup>-/-</sup> eyes. Retinal sections in A-D are from P14 mice and those in E-J are from P21. gcl, ganglion cell layer; inl, inner nuclear layer; onl, outer nuclear layer. The bar is 100 µm in B.

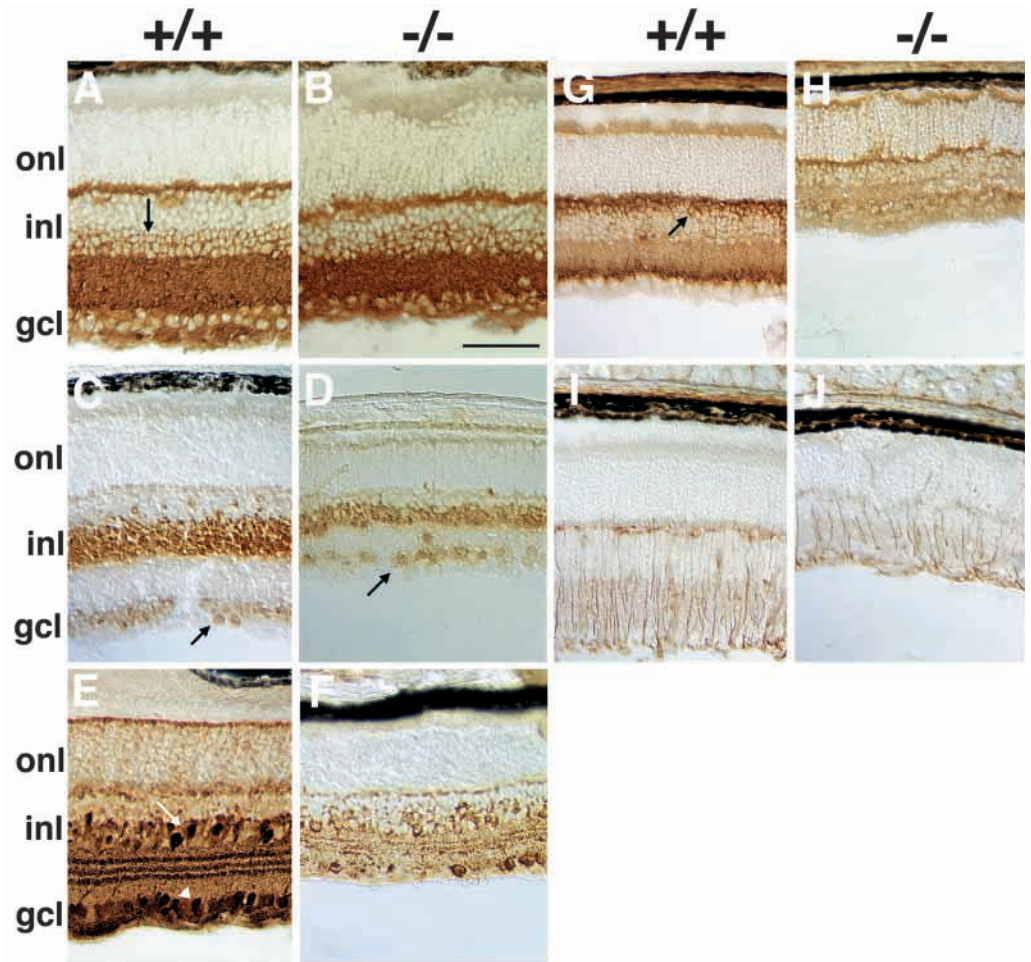

Neurofilament 160 kDa expression in RGCs generally precedes TUJ1 reactivity (Macabe et al., 1999) and can be detected in migrating RGC precursors as well as post-migratory RGCs residing in the GCL. The results were similar to those obtained at E15.5 with TUJ1. In *Math5*<sup>-/-</sup> retinæ at E13.5, there is a conspicuous deficiency of neurofilament-positive RGCs (Fig. 6G,H). A small number of nascent RGCs can be observed, but these are poorly organized. There is no well formed GCL and the few axons present are not bundled into nerve fibers (Fig. 6H). Normally the optic nerve is easily recognized at E13.5 (arrow in Fig. 6G) and RGC axons have already extended toward the optic chiasm. Serial sectioning of E13.5 and E15.5 mutant eyes ( $n=8$ ) failed to detect even a rudimentary optic nerve (data not shown). Instead, we consistently saw a concentration of neurofilament staining in the central retina where the optic nerve normally exits (arrow in Fig. 6H). Because some RGCs appear to form in *Math5*<sup>-/-</sup> embryos, but do not remain in postnatal eyes, we surveyed mutant retinæ for apoptotic cells by activated caspase-3 immunostaining. These experiments provided no evidence of increased programmed cell death in mutant retinæ at E13.5, P0.5, P7, P14 and P21 (data not shown). The small number of RGCs that form independently of *Math5* function must be eliminated from the eye between the ages of E15.5 and P7, but this may occur gradually.

### The increase in cone cell differentiation in *Math5*<sup>-/-</sup> mice occurs early

In *Math5*<sup>-/-</sup> mice, an increase in cone photoreceptors is correlated with the deficiency of RGCs, suggesting that a shift in progenitor cell fate occurs during retinal histogenesis. To explore this hypothesis further, we sought to test *Math5* mutant mice for an increase in cones at the earliest possible age that committed cone photoreceptors can be identified. This is difficult because there is a long delay between cone cell birthdates and overt differentiation. For example, the majority of cones in mice are born between E12 and E15 (Carter-Dawson and LaVail, 1979b), yet cone opsin expression does not begin until P5 (Cepko, 1996; Szel et al., 1993) and focal PNA reactivity is not observed in the outer retina until after P6 (Blanks and Johnson, 1983). To determine whether *Math5* deficiency causes an early increase in cones, we therefore tested the developing retinæ of newborn mutant and wild-type littermates with antibodies to recoverin, a calcium-binding protein that is expressed by rods, cones and cone bipolar cells (Dizhoor et al., 1991; Milam et al., 1993). Recoverin expression normally begins in the outer margin of the mouse retina between E17.5 and P0.5, and thus significantly precedes the appearance of cone opsin and PNA reactivity. Moreover, at P0.5 recoverin expression is almost exclusively restricted to cone photoreceptors, since few rods and no bipolar cells have differentiated at this stage (Belliveau and Cepko, 1999; Morrow et al., 1998). Our results demonstrate a substantial increase in the density of differentiating cones in

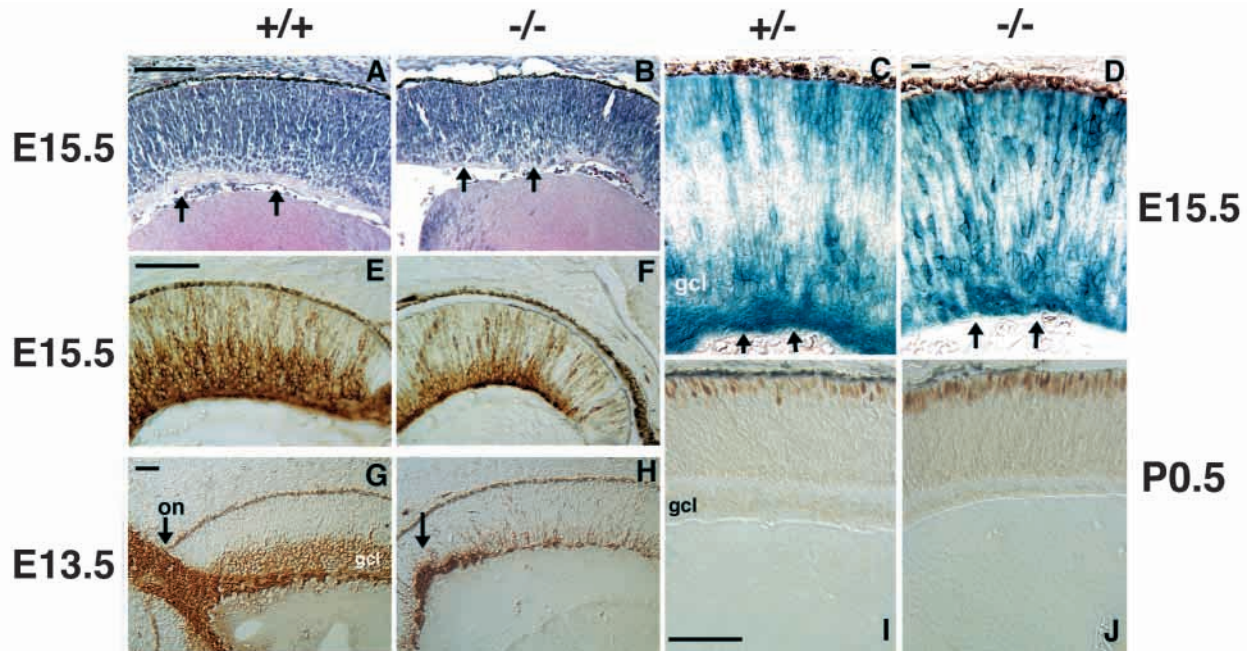

**Fig. 6.** Early stages of RGC and cone formation are abnormal in *Math5*<sup>-/-</sup> retinæ. Micrographs of retinal sections from E15.5 (A-F) and E13.5 (G,H) embryos and P0.5 newborn mice (I,J). (A,B) Hematoxylin and Eosin-stained sections of wild-type (A) and *Math5*<sup>-/-</sup> (B) retinæ. Mutant retinæ are thinner in the radial dimension. Arrows in both panels indicate the position of eosinophilic RGC axon fibers, which are apparent in A but largely absent in B. (C,D)  $\beta$ -gal expression in *Math5*<sup>+/-</sup> and *Math5*<sup>-/-</sup> retinal sections. Arrows indicate the RGC axon fibers in heterozygotes that are greatly reduced in the mutant. *Math5*<sup>-/-</sup>  $\beta$ -gal-expressing cells are distributed across the retinal thickness (top to bottom of D). (E,F) Anti- $\beta$ -tubulin (TUJ1) immunostaining of E15.5 retinæ. A well formed GCL is apparent in the wild-type (E), but is greatly diminished in the *Math5*<sup>-/-</sup> retina (F). (G,H) Neurofilament (160 kDa) immunostaining highlights the failure of *Math5*<sup>-/-</sup> retinæ to form a significant number of RGCs at an early stage. Arrows indicate a normal optic nerve in wild-type (G) and abnormal axons in the *Math5* mutant that do not exit the eye (H). (I,J) Recoverin immunostaining demonstrates an early increase in the density of cone photoreceptors in *Math5*<sup>-/-</sup> mice (J). on, optic nerve; gcl, ganglion cell layer. Bars are 100  $\mu$ m in A,E,I; 20  $\mu$ m in D; and 50  $\mu$ m in G.

*Math5*<sup>-/-</sup> mice at P0.5 compared to wild type (Fig. 6I,J). The shift in retinal cell populations is thus likely to be determined early during histogenesis.

## DISCUSSION

We propose that *Math5* acts positively to determine ganglion cell fate, for four reasons. First, *Math5* expression in retinal progenitors closely matches RGC birthdates (Brown et al., 1998). Second, ectopic expression of the *Xenopus* homologue *Xath5* or the chicken homologue *Cath5* biases retinal progenitors toward an RGC fate (Kanekar et al., 1997; Liu et al., 2001). Third, this is consistent with the established proneural role of other bHLH genes such as *atonal* (Cepko, 1999; Jarman et al., 1994; Kageyama et al., 1995). Fourth, we now report that targeted disruption of *Math5* in mice causes a specific loss of RGCs and optic nerves, and a concomitant increase in cone photoreceptors. While *Math5* may also contribute to early RGC survival, it is not significantly expressed in adult eyes and thus cannot be continuously required for ganglion cell maintenance. Moreover, because mutant eyes are normal in size, *Math5* also does not appear to significantly control growth of the optic cup, in contrast to *Pax6* and *Chx10* (Burmeister et al., 1996; Hogan et al., 1986).

Although other mutations are known that affect the quantity of RGCs in adult mice (Bonfanti et al., 1996; Burne et al.,

1996; Erkman et al., 1996; Gan et al., 1996; Martinou et al., 1994; Rice et al., 1997; Williams et al., 1998), none completely deletes this neuronal cell class. In particular, the less severe phenotype of *Brn3b*<sup>-/-</sup> mice (Erkman et al., 1996; Gan et al., 1996), and the dosage-dependent decrease in *Brn3b* expression in *Math5* mutants at E15.5 (Fig. 1D), strongly suggest that *Brn3b* is a downstream target of *Math5* regulation. A comparable relationship has been demonstrated in *Caenorhabditis elegans* between the *Math5* homologue *lin32* (Portman and Emmons, 2000) and the POU domain transcription factor *unc86* (Baumeister et al., 1996).

### Loss of *Math5* causes a change in cell fate

In *Math5* mutant mice, RGCs are absent and cone photoreceptors increased. This relatively narrow phenotype contrasts sharply with the absence of all photoreceptors in *atonal* mutant flies (Jarman et al., 1994), which occurs because *Drosophila* eye development relies upon sequential inductive mechanisms that begin with R8 cells. We believe the cell type shift in *Math5*<sup>-/-</sup> mice reflects the continuously available pool of progenitors that underlies vertebrate retinogenesis (Cepko et al., 1996; Turner et al., 1990). A similar binary switch has been observed in developing cochlea of *Math1*<sup>-/-</sup> mice, between inner hair cell and supporting cell fates (Bermingham et al., 1999).

We propose that the majority of progenitors that would normally become RGCs switch their primary fate to cones when *Math5* function is removed. Indeed, the changes we



observed in ganglion and cone cell populations are similar in magnitude, and were detected as early as it is possible to reliably identify these two cell types (Fig. 6). The numerical surplus of cones, compared to the loss of RGCs, could arise because precursor cells undergo one to two additional mitoses before differentiating as cones, or because RGCs are normally overproduced and then selectively culled. A developmental connection between RGCs and cones is supported by independent gain- and loss-of-function experiments in which progenitor cell fate was altered by ectopic expression of *Delta1*. Retroviral transduction of chick retinae (Henrique et al., 1997) and mRNA injection of frog retinal precursors (Dorsky et al., 1997) with wild-type *Delta1* biased progenitor cells to become cones. Conversely, infection of chick retinae with a dominant-negative *Delta1* retrovirus produced an excess of RGCs at the expense of photoreceptor cells (Henrique et al., 1997).

Three models can explain the binary cell fate switch in *Math5*<sup>-/-</sup> mice (Fig. 7). Each is consistent with the overlapping early birthdates of RGCs and cones (Altshuler et al., 1991), their shared expression of β-gal in *Math5*<sup>+/-</sup> heterozygotes, and retroviral lineage studies (Turner et al., 1990). These models are conceptually distinct, but not mutually exclusive. First, although vertebrate retinogenesis does not utilize a strict lineage mechanism (Cepko et al., 1996), a subpopulation of precursors may emerge with relatively restricted developmental potential, through which particular cell fates are coupled. In the absence of *Math5*, for example, a bipotential RGC-cone precursor would be expected to differentiate exclusively into cone photoreceptors. Cones would thus represent a specific alternative fate for early progenitors whose RGC development is blocked (Waid and McLoon, 1995). According to this orthodox model, the persistence of β-gal activity in cones (Fig. 2G) may reflect the legacy of *Math5* expression in this bipotential precursor cell. Second, RGCs may act extrinsically to inhibit cone cell determination (Belliveau and Cepko, 1999; Waid and McLoon, 1998), so that loss of *Math5* (and RGCs) may indirectly increase

the abundance of cones. Third, cones may represent a relatively generic default fate for early progenitors whose exit from the cell cycle is delayed (Henrique et al., 1997). According to this model, the essential and primordial role of *Math5* is not to specify ganglion cells per se, but to direct commitment of early retinal neurons to the first appropriate fate, which in vertebrates is an RGC. In the absence of *Math5*, progenitors are forced to commit to the next available fate, which in mice is a cone photoreceptor. The last model is similar to the first but involves a more fluid and time-dependent view of developmental competence (Cepko et al., 1996). In this context, it is compelling that the *lakritz* mutation in the zebrafish *Ath5* gene causes an equivalent deletion of all RGCs and a concomitant increase in amacrine, bipolar and Müller cells, but no change in cone photoreceptors (Kay et al., 2001). These observations correlate well with the relative birth order of retinal cell types in these two species (Altshuler et al., 1991), since cones and rods are the last-born cell types in the central zebrafish retina (Hu and Easter, 1999).

In addition to major changes in RGC and cone populations, we also observed less dramatic reductions in bipolar and Müller glial cell populations in *Math5*<sup>-/-</sup> mutants. There are two possible explanations for this phenotype. First, bipolar and Müller cells may require *Math5* function directly. However, we have been unable to detect either endogenous *Math5* mRNA or β-gal activity in these cell types. Instead, it is more likely that the deficiency of bipolar and Müller glial cells occurs because of an overall defect in retinal development, secondary to the loss of RGCs and depletion of progenitors, since these are the last two cell types to form in the mammalian retina. The reduced thickness of *Math5* mutant retinae at E15.5 supports this idea. We also observed patches of laminar disorganization in *Math5*<sup>-/-</sup> mutants. This may reflect the deficiency of Müller glia, whose processes extend radially across the retina and which are required for laminar integrity (Dubois-Dauphin et al., 2000; Rich et al., 1995; Willbold et al., 2000), or the absence of an inherent patterning function provided by the RGCs during retinal development (Hinds and Hinds, 1974;

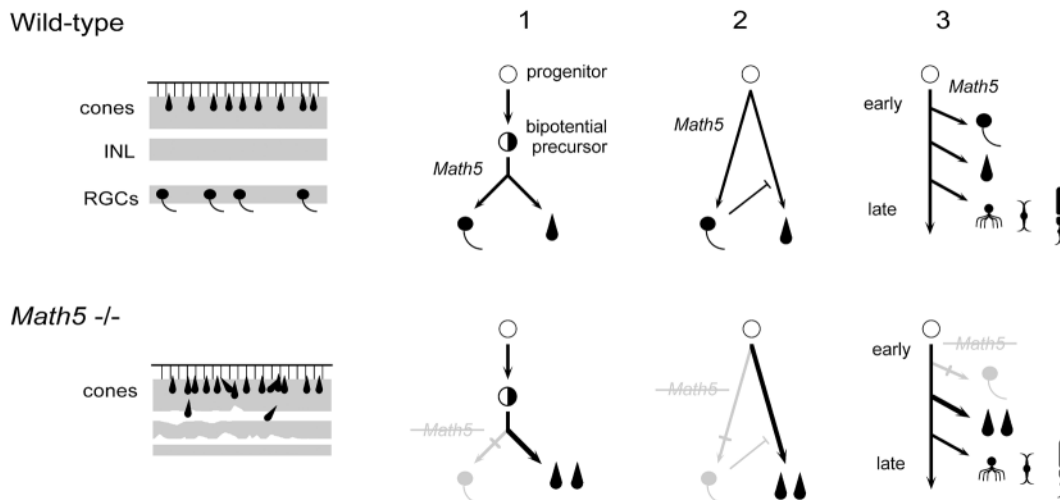

**Fig. 7.** Binary cell fate switch between RGCs and cones in *Math5*<sup>-/-</sup> mice. On the left, diagrams summarize wild-type (upper) and mutant (lower) retinal phenotypes. RGCs are missing and cones are increased in the mutant. The nuclear layers are indicated by shading. The inner nuclear (INL) and plexiform layers are significantly thinner in the mutant and lamination is disrupted in places. On the right, diagrams depict three models that explain the shift from RGCs to cones, which are outlined in the text. In addition to the multipotent progenitor and hypothetical bipotential precursor cells, five differentiated retinal cell types are represented (RGCs, cones, amacrine, bipolar, and rods).

Watanabe et al., 1991). Finally, although we observed no global change in amacrine cells, we believe it will be important in the future to investigate whether the relative abundance of specific subtypes is significantly affected.

### RGC development does not depend strictly upon *Math5*

Because adult *Math5*<sup>-/-</sup> retinæ are missing virtually all RGCs, our finding that a subset of embryonic RGCs can differentiate was unexpected and suggests that the initial specification and development of some RGCs is *Math5*-independent. This situation is not unprecedented since mutations in other vertebrate bHLH genes, such as *Mash1* and *Ngn2*, have been shown to cause a marked reduction, but not the complete deletion of particular neuron classes in the central nervous system (Fode et al., 2000). It will be interesting to study this small, transient class of RGCs further, which can initiate development in the absence of *Math5*. For example, it will be important to determine what becomes of these neurons between ages E15.5 and P21. Since they are so few in number, and unable to organize into an optic nerve or innervate their targets, it is likely that they are cleared from the retina through apoptosis. This occurs during normal postnatal development to a substantial fraction of RGCs whose axons fail to make appropriate synaptic connections in the brain (Bonfanti et al., 1996; Burne et al., 1996; Cowan et al., 1984; Martinou et al., 1994). In *Math5* mutant mice, this apoptosis probably occurs in the interval between P0.5 and P7, since we observed no significant increase in programmed cell death outside this window. It will also be important to determine if these short-lived RGCs correspond to a particular functional or anatomical subclass of RGCs. Finally, it is also possible in theory that these cells are not true RGCs, but are a distinct immature cell type that transiently expresses part of the RGC differentiation program, including *Brn3b*, neural-specific  $\beta$ -tubulin (TUJ1), and neurofilament 160 kDa. We think this latter possibility is unlikely.

While this paper was under review, a similar *Math5* knockout allele was reported, with several notable differences (Wang et al., 2001). First, the  $\beta$ -gal cassette was targeted to the nucleus, although the insertion site was not detailed. As a result, the descendants of *Math5*-expressing progenitors and their cellular processes were not histochemically detectable after differentiation. In contrast, the cytoplasmic  $\beta$ -gal cassette we introduced contains eighteen N-terminal amino acids from the *Math5* polypeptide and was readily detected in the optic nerve at E17.5 and in differentiated cones at P21 (Fig. 2F,G). Since the mRNAs transcribed from these two alleles are likely to have similar half-lives, this limited comparison suggests that the  $\beta$ -galactosidase protein may be stabilized by the *Math5* amino terminus or may have significantly greater stability in the cytoplasm of differentiated neurons (Callahan and Thomas, 1994; Schilling et al., 1991). Second, Wang et al. did not evaluate cone photoreceptors in the *Math5*<sup>-/-</sup> mice and thus did not observe a major cell fate shift. Third, these authors reported a small number of RGCs in adult *Math5*<sup>-/-</sup> mice but none in E13.5 embryos. This discrepancy can be explained if the limited survival of RGCs in *Math5*<sup>-/-</sup> mice is somewhat variable and is influenced by genetic background (Williams et al., 1998). This hypothesis is difficult to evaluate at present since detailed information regarding the mouse strains was not provided, and no systematic breeding scheme was described.

### Together *Math1* and *Math5* reconstitute *atonal* function

Our results significantly advance the concept of functional conservation within the *atonal* gene family. In *Drosophila*, *atonal* controls development of retinal neurons and the chordotonal organs, which are internal mechanosensory structures that act as proprioceptors. In vertebrates, visual system and proprioceptive functions are separated, with *Math5* controlling the former and *Math1* (*Atoh1*) regulating the latter. *Math1* is expressed in cochlear and vestibular hair cells, vibrissae, the dorsal spinal column, joint capsules, Merkel touch receptors, and the cerebellum (Ben-Arie et al., 1997; Ben-Arie et al., 2000; Bermingham et al., 1999). Each of these structures is associated with mechanosensory perception, locomotory coordination or the integration and processing of three-dimensional spatial information. *Math5* and *Math1* are the vertebrate bHLH genes most closely related in structure to *atonal*. This relationship, the absence of significant *Math1* expression in the eye, and the findings we present here, strongly suggest that *Math5* is the *atonal* orthologue, and thus the major proneural gene, for the mammalian eye. There are few other examples where two functions identified in the Metazoa are so cleanly partitioned by evolution in the vertebrate lineage. In other gene families, the expression of paralogous genes is largely overlapping so that phenotypes can arise only at the edges where incomplete redundancy is exposed. In contrast, *Math1* and *Math5* act in independent domains. Taken together they are functionally equivalent to *atonal*.

*Math5* acts during retinal histogenesis, after primary pattern formation in the anterior neural tube, specification of the optic primordia, and the major period of the optic cup growth has occurred. *Math5* expression is dependent upon *Pax6* (Brown et al., 1998), which has been positioned near the top of a hierarchy for metazoan eye development (Gehring and Ikeo, 1999). Consequently, our results, like those of Neumann and Nüsslein-Volhard (Neumann and Nüsslein-Volhard, 2000) for the *hedgehog* genes, show that functional homology in visual system development extends more deeply than *Pax6*. Finally, our results further establish an evolutionary parallel between vertebrate RGCs and fly R8 photoreceptors (Austin et al., 1995; Macabe et al., 1999), the earliest-born neurons of bilaterian visual systems.

We thank Thomas Saunders and Patrick Gillespie of the University of Michigan Transgenic Animal Model Core for assistance in producing mutant mice, with support from the Center for Organogenesis; Grant Mastick, Meredith Applebury, Jenny Robbins, and Alexander Dizhoor for antibody reagents; Ursula Dräger, Janet Blanks, Pete Hitchcock, Pamela Raymond, Greg Dressler, Sally Camper, Jim Lauderdale, Gracie Andrews, Grant Mastick, Connie Cepko and Bill Goossens for scientific and technical advice; and David Ginsburg, Monica Vetter, David Turner, Greg Dressler, Derek van der Kooy and Steve Easter for critically reading the manuscript. J. B. was supported by NIH genetics training grant GM07544. This work was supported by grants from the NIH (EY11729) and the Howard Hughes Medical Institute to T. G.

### REFERENCES

- Altshuler, D. and Cepko, C. (1992). A temporally regulated, diffusible activity is required for rod photoreceptor development in vitro. *Development* **114**, 947-957.

- Altshuler, D. M., Turner, D. L. and Cepko, C. L. (1991). Specification of cell type in the vertebrate retina. In *Cell Lineage and Cell fate in Visual System Development* (ed. D. M.-K. Lam and C. J. Shatz), pp. 37-58. Cambridge, MA: MIT Press.
- Applebury, M. L., Antoch, M. P., Baxter, L. C., Chun, L. L., Falk, J. D., Farhangfar, F., Kage, K., Krzystolik, M. G., Lyass, L. A. and Robbins, J. T. (2000). The murine cone photoreceptor: a single cone type expresses both S and M opsins with retinal spatial patterning. *Neuron* **27**, 513-523.
- Austin, C. P., Feldman, D. E., Ida, J. A. and Cepko, C. L. (1995). Vertebrate retinal ganglion cells are selected from competent progenitors by the action of *Notch*. *Development* **121**, 3637-3650.
- Ballesta, J., Terenghi, G., Thibault, J. and Polak, J. M. (1984). Putative dopamine-containing cells in the retina of seven species demonstrated by tyrosine hydroxylase immunocytochemistry. *Neuroscience* **12**, 1147-1156.
- Barnstable, C. J., Hofstein, R. and Akagawa, K. (1985). A marker of early amacrine cell development in rat retina. *Brain Res.* **352**, 286-290.
- Baumeister, R., Liu, Y. and Ruvkun, G. (1996). Lineage-specific regulators couple cell lineage asymmetry to the transcription of the *Caenorhabditis elegans* POU gene *unc-86* during neurogenesis. *Genes Dev.* **10**, 1395-1410.
- Belecky-Adams, T., Tomarev, S., Li, H. S., Ploder, L., McInnes, R. R., Sundin, O. and Adler, R. (1997). Pax-6, Prox 1, and Chx10 homeobox gene expression correlates with phenotypic fate of retinal precursor cells. *Invest. Ophthalmol. Vis. Sci.* **38**, 1293-1303.
- Belliveau, M. J. and Cepko, C. L. (1999). Extrinsic and intrinsic factors control the genesis of amacrine and cone cells in the rat retina. *Development* **126**, 555-566.
- Ben-Arie, N., Bellen, H. J., Armstrong, D. L., McCall, A. E., Gordadze, P. R., Guo, Q., Matzuk, M. M. and Zoghbi, H. Y. (1997). Math1 is essential for genesis of cerebellar granule neurons. *Nature* **390**, 169-172.
- Ben-Arie, N., Hassan, B. A., Bermingham, N. A., Malicki, D. M., Armstrong, D., Matzuk, M., Bellen, H. J. and Zoghbi, H. Y. (2000). Functional conservation of *atonal* and *Math1* in the CNS and PNS. *Development* **127**, 1039-1048.
- Bermingham, N. A., Hassan, B. A., Price, S. D., Vollrath, M. A., Ben-Arie, N., Eatock, R. A., Bellen, H. J., Lysakowski, A. and Zoghbi, H. Y. (1999). Math1: an essential gene for the generation of inner ear hair cells. *Science* **284**, 1837-1841.
- Birgbauer, E., Cowan, C. A., Sretavan, D. W. and Henkemeyer, M. (2000). Kinase independent function of EphB receptors in retinal axon pathfinding to the optic disc from dorsal but not ventral retina. *Development* **127**, 1231-1241.
- Blanks, J. C. and Johnson, L. V. (1983). Selective lectin binding of the developing mouse retina. *J. Comp. Neurol.* **221**, 31-41.
- Bonfanti, L., Stretto, E., Chierzi, S., Cenni, M. C., Liu, X. H., Martinou, J. C., Maffei, L. and Rabacchi, S. A. (1996). Protection of retinal ganglion cells from natural and axotomy-induced cell death in neonatal transgenic mice overexpressing bcl-2. *J. Neurosci.* **16**, 4186-4194.
- Brennan, C. A. and Moses, K. (2000). Determination of Drosophila photoreceptors: timing is everything. *Cell. Mol. Life Sci.* **57**, 195-214.
- Brittis, P. A. and Silver, J. (1994). Exogenous glycosaminoglycans induce complete inversion of retinal ganglion cell bodies and their axons within the retinal neuroepithelium. *Proc. Natl. Acad. Sci. USA* **91**, 7539-7542.
- Brown, N. L., Kanekar, S., Vetter, M. L., Tucker, P. K., Gemza, D. L. and Glaser, T. M. (1998). *Math5* encodes a murine basic helix-loop-helix transcription factor expressed during early stages of retinal neurogenesis. *Development* **125**, 4821-4833.
- Burmeister, M., Novak, J., Liang, M. Y., Basu, S., Ploder, L., Hawes, N. L., Vidgen, D., Hoover, F., Goldman, D., Kalnins, V. I., Roderick, T. H., Taylor, B. A., Hankin, M. H. and McInnes, R. R. (1996). Ocular retardation mouse caused by Chx10 homeobox null allele: impaired retinal progenitor proliferation and bipolar cell differentiation. *Nat. Genet.* **12**, 376-384.
- Burne, J. F., Staple, J. K. and Raff, M. C. (1996). Glial cells are increased proportionally in transgenic optic nerves with increased numbers of axons. *J. Neurosci.* **16**, 2064-2073.
- Callahan, C. A. and Thomas, J. B. (1994). Tau- $\beta$ -galactosidase, an axon-targeted fusion protein. *Proc. Natl. Acad. Sci. USA* **91**, 5972-5976.
- Carter-Dawson, L. D. and LaVail, M. M. (1979a). Rods and cones in the mouse retina. I. Structural analysis using light and electron microscopy. *J. Comp. Neurol.* **188**, 245-262.
- Carter-Dawson, L. D. and LaVail, M. M. (1979b). Rods and cones in the mouse retina. II. Autoradiographic analysis of cell generation using tritiated thymidine. *J. Comp. Neurol.* **188**, 263-272.
- Cepko, C. L. (1996). The patterning and onset of opsin expression in vertebrate retinæ. *Curr. Opin. Neurobiol.* **6**, 542-546.
- Cepko, C. L. (1999). The roles of intrinsic and extrinsic cues and bHLH genes in the determination of cell fates. *Curr. Opin. Neurobiol.* **9**, 37-46.
- Cepko, C. L., Austin, C. P., Yang, X., Alexiades, M. and Ezzeddine, D. (1996). Cell fate determination in the vertebrate retina. *Proc. Natl. Acad. Sci. USA* **93**, 589-595.
- Chien, C.-T., Hsiao, C.-D., Jan, L. Y. and Jan, Y. N. (1996). Neuronal type information encoded in the basic helix-loop-helix domain of proneural genes. *Proc. Natl. Acad. Sci. USA* **93**, 13239-13244.
- Cowan, W. M., Fawcett, J. W., O'Leary, D. D. and Stanfield, B. B. (1984). Regressive events in neurogenesis. *Science* **225**, 1258-1265.
- Davis, J. A. and Reed, R. R. (1996). Role of Olf-1 and Pax-6 transcription factors in neurodevelopment. *J. Neurosci.* **16**, 5082-5094.
- Deiner, M. S., Kennedy, T. E., Fazeli, A., Serafini, T., Tessier-Lavigne, M. and Sretavan, D. W. (1997). Netrin-1 and DCC mediate axon guidance locally at the optic disc: loss of function leads to optic nerve hypoplasia. *Neuron* **19**, 575-589.
- Dizhoor, A. M., Ray, S., Kumar, S., Niemi, G., Spencer, M., Brolley, D., Walsh, K. A., Philipov, P. P., Hurley, J. B. and Stryer, L. (1991). Recoverin: a calcium sensitive activator of retinal rod guanylate cyclase. *Science* **251**, 915-918.
- Dokucu, M. E., Zipursky, S. L. and Cagan, R. L. (1996). Atonal, rough and the resolution of proneural clusters in the developing Drosophila retina. *Development* **122**, 4139-4147.
- Dorsky, R. I., Chang, W. S., Rapaport, D. H. and Harris, W. A. (1997). Regulation of neuronal diversity in the Xenopus retina by Delta signalling. *Nature* **385**, 67-70.
- Drager, U. C. and Olsen, J. F. (1981). Ganglion cell distribution in the retina of the mouse. *Invest. Ophthalmol. Vis. Sci.* **20**, 285-293.
- Dubois-Dauphin, M., Poitry-Yamate, C., de Bilbao, F., Julliard, A. K., Jourdan, F. and Donati, G. (2000). Early postnatal Muller cell death leads to retinal but not optic nerve degeneration in NSE-Hu-Bcl-2 transgenic mice. *Neuroscience* **95**, 9-21.
- Erkman, L., McEvelly, R. J., Luo, L., Ryan, A. K., Hooshmand, F., O'Connell, S. M., Keithley, E. M., Rapaport, D. H., Ryan, A. F. and Rosenfeld, M. G. (1996). Role of transcription factors Brn-3.1 and Brn-3.2 in auditory and visual system development. *Nature* **381**, 603-606.
- Evers, P. and Uylings, H. B. (1997). An optimal antigen retrieval method suitable for different antibodies on human brain tissue stored for several years in formaldehyde fixative. *J. Neurosci. Meth.* **72**, 197-207.
- Fode, C., Ma, Q., Casarosa, S., Ang, S. L., Anderson, D. J., and Guillemot, F. (2000). A role for neural determination genes in specifying the dorsoventral identity of telencephalic neurons. *Genes Dev.* **14**, 67-80.
- Gan, L., Xiang, M., Zhou, L., Wagner, D. S., Klein, W. H. and Nathans, J. (1996). Pou domain factor Brn-3b is required for the development of a large set of retinal ganglion cells. *Proc. Natl. Acad. Sci. USA* **93**, 3920-3925.
- Gehring, W. J. and Ikeo, K. (1999). Pax6: mastering eye morphogenesis and eye evolution. *Trends Genet.* **15**, 371-7.
- Hall, C. V., Jacob, P. E., Ringold, G. M. and Lee, F. (1983). Expression and regulation of Escherichia coli lacZ gene fusions in mammalian cells. *J. Mol. Appl. Genet.* **2**, 101-109.
- Hassan, B. A. and Bellen, H. J. (2000). Doing the MATH: is the mouse a good model for fly development? *Genes Dev.* **14**, 1852-1865.
- Hassan, B. A., Bermingham, N. A., He, Y., Sun, Y., Jan, Y. N., Zoghbi, H. Y. and Bellen, H. J. (2000). *atonal* regulates neurite arborization but does not act as a proneural gene in the Drosophila brain. *Neuron* **25**, 549-561.
- Henrique, D., Hirsinger, E., Adam, J., Le Roux, I., Pourquie, O., Ish-Horowitz, D. and Lewis, J. (1997). Maintenance of neuroepithelial progenitor cells by Delta-Notch signalling in the embryonic chick retina. *Curr. Biol.* **7**, 661-670.
- Hinds, J. W. and Hinds, P. L. (1974). Early ganglion cell differentiation in the mouse retina: An electron microscopic analysis utilizing serial sections. *Dev. Biol.* **37**, 381-416.
- Hitchcock, P. F., Macdonald, R. E., Van de Ryt, J. T. and Wilson, S. W. (1996). Antibodies against Pax6 immunostain amacrine and ganglion cells and neuronal progenitors, but not rod precursors, in the normal and regenerating retina of the goldfish. *J. Neurobiol.* **29**, 399-413.
- Hogan, B. L. M., Horsburgh, G., Cohen, J., Hetherington, C. M., Fisher, G. and Lyon, M. F. (1986). *Small eyes (Sey)*: a homozygous lethal mutation on chromosome 2 which affects the differentiation of both lens and nasal placodes in the mouse. *J. Embryol. Exp. Morphol.* **97**, 95-110.
- Hu, M. and Easter, S. S. (1999). Retinal neurogenesis: the formation of the initial central patch of postmitotic cells. *Dev. Biol.* **207**, 309-321.

- Jarman, A. P., Grell, E. H., Ackerman, L., Jan, L. Y. and Jan, Y. N. (1994). *atonal* is the proneural gene for *Drosophila* photoreceptors. *Nature* **369**, 398-400.
- Jarman, A. P., Sun, Y., Jan, L. Y. and Jan, Y. N. (1995). Role of the proneural gene, *atonal*, in formation of *Drosophila* chordotonal organs and photoreceptors. *Development* **121**, 2019-2030.
- Jeon, C.-J., Strettoi, E. and Masland, R. H. (1998). The major populations of the mouse retina. *J. Neurosci.* **18**, 8936-8946.
- Kageyama, R., Sasai, Y., Akazawa, C., Makoto, I., Takebayashi, K., Shimizu, C., Tomita, K. and Nakanishi, S. (1995). Regulation of mammalian neural development by helix-loop-helix transcription factors. *Crit. Rev. Neurobiol.* **9**, 177-188.
- Kanekar, S., Perron, M., Dorsky, R., Harris, W. A., Jan, L. Y., Jan, Y. N. and Vetter, M. L. (1997). *Xath5* participates in a network of bHLH genes in the developing *Xenopus* retina. *Neuron* **19**, 981-994.
- Kay, J. N., Finger, K. C., Roeser, T., Staub, W. and Baier, H. (2001). Retinal ganglion cell determination requires *lakritz*, a zebrafish homolog of *Drosophila atonal*. *Neuron* (in press).
- Koroma, B. M., Yang, J. M. and Sundin, O. H. (1997). The Pax-6 homeobox gene is expressed throughout the corneal and conjunctival epithelia. *Invest. Ophthalmol. Vis. Sci.* **38**, 108-120.
- Lawson, K. A., Dunn, N. R., Roelen, B. A., Zeinstra, L. M., Davis, A. M., Wright, C. V., Korving, J. P. and Hogan, B. L. (1999). *Bmp4* is required for the generation of primordial germ cells in the mouse embryo. *Genes Dev.* **13**, 424-436.
- Liu, W., Mo, Z. and Xiang, M. (2001). The *Ath5* proneural genes function upstream of *Brn3* POU domain transcription factor genes to promote retinal ganglion cell development. *Proc. Natl. Acad. Sci. USA* **98**, 1649-1654.
- Macabe, K. L., Gunther, E. C. and Reh, T. A. (1999). The development of the pattern of retinal ganglion cells in the chick retina: mechanisms that control differentiation. *Development* **126**, 5713-5724.
- MacNeil, M. A. and Masland, R. H. (1998). Extreme diversity among amacrine cells: implications for function. *Neuron* **20**, 971-982.
- Martinou, J. C., Dubois-Dauphin, M., Staple, J. K., Rodriguez, I., Frankowski, H., Missotten, M., Albertini, P., Talabot, D., Catsicas, S., Pietra, C. and Huarte, J. (1994). Overexpression of *Bcl-2* in transgenic mice protects neurons from naturally occurring cell death and experimental ischemia. *Neuron* **13**, 1017-1030.
- Masai, I., Stemple, D. L., Okamoto, H. and Wilson, S. W. (2000). Midline signals regulate retinal neurogenesis in zebrafish. *Neuron* **27**, 251-263.
- Masland, R. H. (1988). Amacrine cells. *Trends Neurosci.* **11**, 405-410.
- Massey, S. C. and Mills, S. L. (1999). Antibody to calretinin stains all amacrine cells in the rabbit retina: double-label and confocal analyses. *J. Comp. Neurol.* **411**, 3-18.
- Mastick, G. S. and Andrews, G. L. (2001). *Pax6* Regulates the Identity of Embryonic Diencephalic Neurons. *Mol. Cell Neurosci.* **17**, 190-207.
- Matter-Sadzinski, L., Matter, J. M., Ong, M. T., Hernandez, J. and Ballivet, M. (2001). Specification of neurotransmitter receptor identity in developing retina: the chick *ATH5* promoter integrates the positive and negative effects of several bHLH proteins. *Development* **128**, 217-231.
- Milam, A. H., Dacey, D. M. and Dizhoor, A. M. (1993). Recoverin immunoreactivity in mammalian cone bipolar cells. *Vis. Neurosci.* **10**, 1-12.
- Morrow, E. M., Belliveau, M. J. and Cepko, C. L. (1998). Two phases of rod photoreceptor differentiation during rat retinal development. *J. Neurosci.* **18**, 3738-3748.
- Nagy, A., Rossant, J., Nagy, R., Abramow-Newerly, W. and Roder, J. C. (1993). Derivation of completely cell culture-derived mice from early-passage embryonic stem cells. *Proc. Natl. Acad. Sci. USA* **90**, 8424-8428.
- Neumann, C. J. and Nusslein-Volhard, C. (2000). Patterning of the zebrafish retina by a wave of sonic hedgehog activity. *Science* **289**, 2137-2139.
- Ng, L., Hurley, J. B., Dierks, B., Srinivas, M., Salto, C., Vennstrom, B., Reh, T. A. and Forrest, D. (2001). A thyroid hormone receptor that is required for the development of green cone photoreceptors. *Nat. Genet.* **27**, 94-98.
- Nixon, R. A., Lewis, S. E., Dahl, D., Marotta, C. A. and Drager, U. C. (1989). Early posttranslational modifications of the three neurofilament subunits in mouse retinal ganglion cells: neuronal sites and time course in relation to subunit polymerization and axonal transport. *Brain. Res. Mol. Brain Res.* **5**, 93-108.
- Perry, V. H. (1981). Evidence for an amacrine cell system in the ganglion cell layer of the rat retina. *Neuroscience* **6**, 931-944.
- Portman, D. S. and Emmons, S. W. (2000). The basic helix-loop-helix transcription factors LIN-32 and HLH-2 function together in multiple steps of a *C. elegans* neuronal sublineage. *Development* **127**, 5415-5426.
- Ramón y Cajal, S. (1892). *The Structure of the Retina*. S. A. Thorpe and M. Glickstein, translators. 1972 edition Springfield, Illinois: Charles C. Thomas.
- Rice, D. S., Tang, Q., Williams, R. W., Harris, B. S., Davisson, M. T. and Goldowitz, D. (1997). Decreased retinal ganglion cell number and misdirected axon growth associated with fissure defects in *Bst/+* mutant mice. *Invest. Ophthalmol. Vis. Sci.* **38**, 2112-2124.
- Rich, K. A., Figueroa, S. L., Zhan, Y. and Blanks, J. C. (1995). Effects of Muller cell disruption on mouse photoreceptor cell development. *Exp. Eye Res.* **61**, 235-248.
- Rich, K. A., Zhan, Y. and Blanks, J. C. (1997). Migration and synaptogenesis of cone photoreceptors in the developing mouse retina. *J. Comp. Neurol.* **388**, 47-63.
- Rockhill, R. L., Euler, T. and Masland, R. H. (2000). Spatial order within but not between types of retinal neurons. *Proc. Natl. Acad. Sci. USA* **97**, 2303-2307.
- Rodieck, R. W. (1998). *The First Steps in Seeing*. Sunderland, MA: Sinauer.
- Rubin, G. M. (1989). Development of the *Drosophila* retina: Inductive events studied at single cell resolution. *Cell* **57**, 519-520.
- Sanes, J. R., Rubenstein, J. L. and Nicolas, J. F. (1986). Use of a recombinant retrovirus to study post-implantation cell lineage in mouse embryos. *EMBO J.* **5**, 3133-3142.
- Schilling, K., Luk, D., Morgan, J. I. and Curran, T. (1991). Regulation of a fos-lacZ fusion gene: a paradigm for quantitative analysis of stimulus-transcription coupling. *Proc. Natl. Acad. Sci. USA* **88**, 5665-5669.
- Sidman, R. L. (1961). Histogenesis of mouse retina studied with thymidine-H<sup>3</sup>. In *Structure of the Eye* (ed. G. K. Smelser), pp. 487-506. New York: Academic Press.
- Silver, J. and Sidman, R. L. (1980). A mechanism for the guidance and topographic patterning of retinal ganglion cell axons. *J. Comp. Neurol.* **189**, 101-111.
- Snow, R. L. and Robson, J. A. (1994). Ganglion cell neurogenesis, migration and early differentiation in the chick retina. *Neuroscience* **58**, 399-409.
- Sokal, R. R. and Rohlf, F. J. (1969). Biometry. The principles and practice of statistics in biological research. pp. 392-4. San Francisco: W. H. Freeman.
- Strettoi, E. and Masland, R. H. (1996). The number of unidentified amacrine cells in the mammalian retina. *Proc. Natl. Acad. Sci. USA* **93**, 14906-14911.
- Sun, Y., Jan, L. Y. and Jan, Y. N. (2000). Ectopic scute induces *Drosophila* ommatidia development without R8 founder photoreceptors. *Proc. Natl. Acad. Sci. USA* **97**, 6815-6189.
- Sundin, O. H. and Eichele, G. (1990). A homeodomain protein reveals the metameric nature of the developing chick hindbrain. *Genes Dev.* **4**, 1267-1276.
- Szel, A., Rohlich, P., Mieziwska, K., Aguirre, G. and van Veen, T. (1993). Spatial and temporal differences between the expression of short- and middle-wave sensitive cone pigments in the mouse retina: a developmental study. *J. Comp. Neurol.* **331**, 564-577.
- Tomlinson, A. (1988). Cellular interactions in the developing *Drosophila* eye. *Development* **104**, 183-193.
- Turner, D. L., Snyder, E. Y. and Cepko, C. L. (1990). Lineage-independent determination of cell type in the mouse retina. *Neuron* **4**, 833-845.
- Waid, D. K. and McLoon, S. C. (1998). Ganglion cells influence the fate of dividing retinal cells in culture. *Development* **125**, 1059-1066.
- Waid, D. K. and McLoon, S. C. (1995). Immediate differentiation of ganglion cells following mitosis in the developing retina. *Neuron* **14**, 117-124.
- Wang, S. W., Kim, B. S., Ding, K., Wang, H., Sun, D., Johnson, R. L., Klein, W. H. and Gan, L. (2001). Requirement for *math5* in the development of retinal ganglion cells. *Genes Dev.* **15**, 24-29.
- Watanabe, M., Rutishauser, U. and Silver, J. (1991). Formation of retinal ganglion cell and optic fiber layers. *J. Neurobiol.* **22**, 85-96.
- Willbold, E., Rothermel, A., Tomlinson, S. and Layer, P. G. (2000). Muller glia cells reorganize reaggregating chicken retinal cells into correctly laminated in vitro retinæ. *Glia* **29**, 45-57.
- Williams, R. W., Strom, R. C. and Goldwitz, D. (1998). Natural variation in neuron number in mice is linked to a major quantitative trait locus on chromosome 11. *J. Neurosci.* **18**, 138-146.
- Xiang, M., Zhou, H. and Nathans, J. (1996). Molecular biology of retinal ganglion cells. *Proc. Natl. Acad. Sci. USA* **93**, 596-601.
- Xiang, M., Zhou, L., Peng, Y. W., Eddy, R. L., Shows, T. B. and Nathans, J. (1993). *Brn-3b*: a POU domain gene expressed in a subset of retinal ganglion cells. *Neuron* **11**, 689-701.
- Young, R. W. (1985). Cell differentiation in the retina of the mouse. *Anat. Rec.* **212**, 199-205.
